## Correction

## Correction for: Posttranscriptional regulation of AKT by circular RNA angiomin-1 mediates chemoresistance against paclitaxel in breast cancer cells

Jian Ma<sup>1,2</sup>, Ling Fang<sup>1</sup>, Qi Yang<sup>1,3</sup>, Steven Hibberd<sup>1</sup>, William W. Du<sup>1,4</sup>, Nan Wu<sup>1</sup>, Burton B. Yang<sup>1,4</sup>

<sup>1</sup>Sunnybrook Research Institute, Sunnybrook Health Sciences Centre, Toronto, Canada

<sup>2</sup>Department of Urology, The Affiliated Yantai Yuhuangding Hospital of Qingdao University, Yantai, China

<sup>3</sup>The First Hospital, Jilin University, Jilin, China

<sup>4</sup>Department of Laboratory Medicine and Pathobiology, University of Toronto, Toronto, Canada

**Correspondence to:** Burton B. Yang, Nan Wu; email: [byang@sri.utoronto.ca](mailto:byang@sri.utoronto.ca), [wunan.my@gmail.com](mailto:wunan.my@gmail.com)

**Keywords:** circular RNA, circAMOTL1, chemoresistance, PAX, AKT

**Abbreviations:** DMEM: Dulbecco's modified Eagle's medium; FBS: fetal bovine serum; GFP: green fluorescent protein

**Original article:** *Aging (Albany NY)* 2019; 11:11369–11381

PMID: [31819016](https://pubmed.ncbi.nlm.nih.gov/31819016/)

PMCID: [PMC6932896](https://pubmed.ncbi.nlm.nih.gov/PMC6932896/)

doi: [10.18632/aging.102535](https://doi.org/10.18632/aging.102535)

**This article has been corrected:** The authors have requested a replacement for Figure 4D. A representative image of the si-circAMOTL1 Control sample in Figure 4D was mistakenly mixed up. The correct panel has now been prepared with the si-circAMOTL1 Control image from the original set of experiments. This alteration does not affect the results or conclusions of this work.

The correct Figure 4D is presented below:

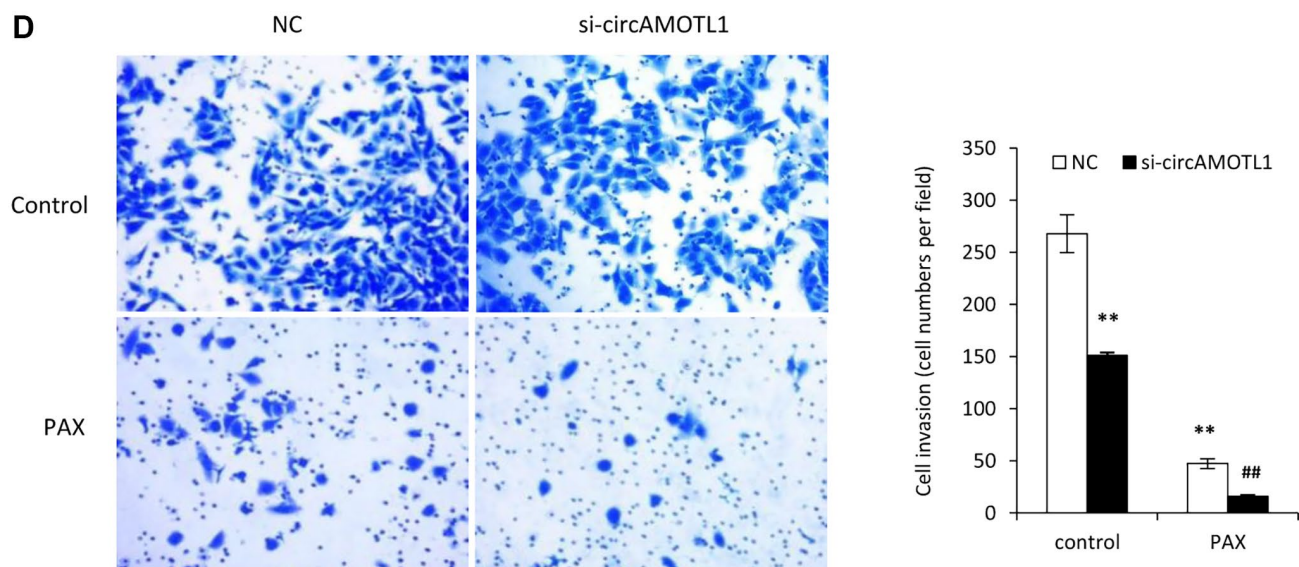

**Figure 4. Effect of circAMOTL1 siRNA on PAX treatment.** MDA-MB-231 cells transfected with negative control or circAMOTL1 siRNA (si-circAMOTL1) were treated with 1 µg/ml PAX for 24 hours. ... ((D) Cell invasive ability upon PAX treatment was measured with Matrigel invasion assay. Experiments were performed in triplicate. \*\* $p < 0.01$  compared to untreated negative control. ## $p < 0.01$  compared to untreated si-circAMOTL1.
